# Supplementary material
Source: PubMed Central journal article supplement (PMC3039015)
Supplement: supp_124_5_693_v2_1.pdf [file supp_124_5_693_v2_1.pdf]

**Table S1. Table of all MT studies.**

|                     | <b>Total no. MTs</b> | <b>No. of MTs with unknown polarity</b> | <b>Unknown polarity (% of all MTs)</b> | <b>No. of known MT plus ends</b> |
|---------------------|----------------------|-----------------------------------------|----------------------------------------|----------------------------------|
| <b>WT</b>           | 63                   | 17                                      | 27                                     | 46                               |
| <b>MBC-treated</b>  | 113                  | 52                                      | 46                                     | 58                               |
| <b>MBC-released</b> | 87                   | 31                                      | 36                                     | 51                               |

Ambiguous ends are those MT ends that lie outside the reconstructed volume (80% of all ambiguous ends) or that were unclassifiable owing to noise (20% of ambiguous ends).
