# Supplementary material
Source: PubMed Central journal article supplement (PMC3039015)
Supplement: supp_124_5_693_v2_2.pdf [file supp_124_5_693_v2_2.pdf]

**Table S2. Number of MTs displaying each combination of end structures.**

|                     | <b>capped/flared</b> | <b>capped/curled</b> | <b>capped/blunt</b> | <b>capped/sheet</b> | <b>flared/flared</b> | <b>blunt/blunt</b> |
|---------------------|----------------------|----------------------|---------------------|---------------------|----------------------|--------------------|
| <b>WT</b>           | 15                   | 5                    | 3                   | 0                   | 5                    | 0                  |
| <b>MBC-treated</b>  | 34                   | 6                    | 0                   | 2                   | 15                   | 1                  |
| <b>MBC-released</b> | 39                   | 2                    | 2                   | 1                   | 7                    | 0                  |

|                     | <b>sheet/sheet</b> | <b>curled/curled</b> | <b>flared/blunt</b> | <b>flared/sheet</b> | <b>flared/curled</b> | <b>blunt/sheet</b> |
|---------------------|--------------------|----------------------|---------------------|---------------------|----------------------|--------------------|
| <b>WT</b>           | 0                  | 1                    | 3                   | 2                   | 2                    | 0                  |
| <b>MBC-treated</b>  | 0                  | 0                    | 1                   | 0                   | 2                    | 0                  |
| <b>MBC-released</b> | 0                  | 0                    | 1                   | 1                   | 3                    | 0                  |

|                     | <b>blunt/curled</b> | <b>curled/sheet</b> | <b>flared/amb.</b> | <b>amb./amb.</b> | <b>capped/amb.</b> | <b>curled/amb.</b> |
|---------------------|---------------------|---------------------|--------------------|------------------|--------------------|--------------------|
| <b>WT</b>           | 0                   | 0                   | 10                 | 7                | 9                  | 0                  |
| <b>MBC-treated</b>  | 0                   | 0                   | 18                 | 16               | 15                 | 2                  |
| <b>MBC-released</b> | 0                   | 0                   | 12                 | 6                | 9                  | 1                  |

|                     | <b>blunt/ambiguous</b> | <b>sheet/ambiguous</b> |
|---------------------|------------------------|------------------------|
| <b>WT</b>           | 1                      | 0                      |
| <b>MBC-treated</b>  | 1                      | 0                      |
| <b>MBC-released</b> | 2                      | 1                      |
